# Supplementary material for: Screening for thyroid dysfunction with free T4 instead of thyroid stimulating hormone (TSH) improves efficiency in older adults in primary care
Source: PubMed Central journal article supplement — Age Ageing. 2022 Sep 29;51(9):afac215. doi: 10.1093/ageing/afac215 (PMC9521794; doi:10.1093/ageing/afac215), 2022-09-29
Supplement: aa-22-0020-file003_afac215.pdf [file aa-22-0020-file003_afac215.pdf]

**Screening for thyroid dysfunction with free T4 instead of thyroid stimulating hormone (TSH)  
improves efficiency in older adults in primary care**

*Supplementary data*

Supplementary Figure 1.

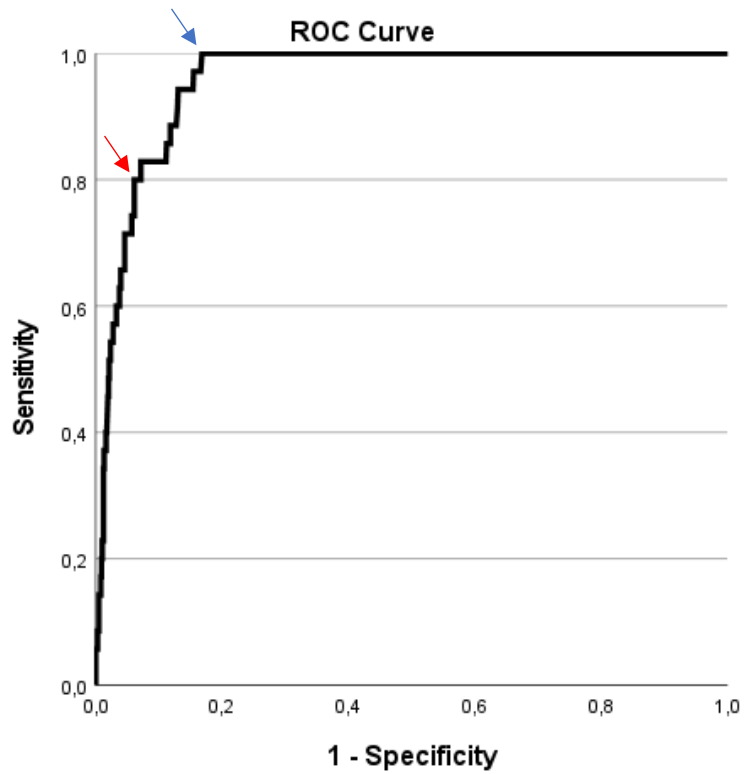

ROC curve for the TSH cut-off value. Clinical hypothyroidism was defined as TSH > 4.2 mU/l and fT4 < 12 pmol/l. The ROC curves display the prediction potential of TSH for clinical hypothyroidism. It should be noted that there is no gold standard available for thyroid function testing and TSH is part of the definition. For the elevated cutoff TSH > 6.5 mU/l, the sensitivity was 80%, the specificity 94% (see red arrow), compared to a sensitivity per definition of 100% for TSH > 4.2 mU/l and a specificity of 83%.

**Supplementary Table 1.** Diagnosis of hyperthyroidism in the three proposed strategies.

|                                         | Current screening<br>protocol: TSH > 4.2 mU/l<br>LRL TSH < 0.27 mU/l<br><i>model 1</i> | Elevation of the TSH cut off<br>value to > 6.5 mU/l<br>LRL TSH < 0.27 mU/l<br><i>model 2</i> | Screening based on fT4:<br>fT4 < 12.0 pmol/l<br>URL fT4 > 22 pmol/l<br><i>model 3</i> |
|-----------------------------------------|----------------------------------------------------------------------------------------|----------------------------------------------------------------------------------------------|---------------------------------------------------------------------------------------|
| <b>Reflex tests for hyperthyroidism</b> | 40 (3.9%)                                                                              | 40 (3.9%)                                                                                    | 47 (4.6%)                                                                             |
| <b>Clinical hyperthyroidism</b>         | 17 (1.7%)                                                                              | 17 (1.7%)                                                                                    | 17 (1.7%)                                                                             |
| <b>PPV hyperthyroidism</b>              | 42.5%                                                                                  | 42.5%                                                                                        | 36.2%                                                                                 |
| <b>NPV hyperthyroidism</b>              | 96.9%                                                                                  | 96.9%                                                                                        | 95.9%                                                                                 |
